# Supplementary material for: Geochemical recovery of the Torna–Marcal river system after the Ajka red mud spill, Hungary
Source: Royal Society of Chemistry journal article supplement (doi:10.1039/c4em00452c), 2014-01-01
Supplement: c4em00452c1.csv [file c4em00452c1.csv]

TITLE: Total sediment elemental data for Ajka (Hungary) fluvial sediment surveys in December 2010 and September 2014
LOCATION: Torna Creek, Marcal River, Raba River and Mosoni-Duna catchments
METHOD: Total elemental concentration of dried sediments by acid digestion and ICP-OES (see DOI: 10.1021/es200850y for detailed methods). All values in mg/kg
AUTHOR: W. MAYES (ORCID: 0000-0002-1864-9057)
Sample_CODE	Date	X	Y	Al	As	Ba	Ca	Co	Cr	Cu	Fe	Ga	K	Li	Mg	Mn	Mo	Na	Ni	Pb	Ti	V	Zn	Zr	Sr	S
K1A	1 Dec 2010	17.490788	47.0903	65373.54	88.64	64.07	53883.64	111.59	933.74	68.90	214222.68	78.54	796.36	57.62	3158.66	3054.95	17.96	42226.09	363.77	179.46	26175.78	947.23	218.40	652.65	311.95	2715.50
K1B	1 Dec 2010	17.490788	47.0903	82268.76	36.91	57.30	50718.73	87.53	732.95	55.33	200190.40	82.33	729.55	58.17	2760.44	2293.72	13.31	40371.96	259.27	139.96	24237.17	844.84	143.15	618.72	277.84	2699.50
K1C	1 Dec 2010	17.490788	47.0903	74837.56	109.84	58.04	55901.73	92.19	765.51	56.70	216381.69	77.00	685.25	56.84	3028.22	2348.68	11.86	37156.82	251.91	152.29	24133.29	881.45	157.95	615.29	280.88	2661.33
K2A	1 Dec 2010	17.490783	47.0903	38347.04	27.33	183.54	116583.77	11.59	81.78	14.34	34191.23	25.37	7451.85	36.69	20649.20	397.36	7.27	5560.47	22.75	0.63	2957.51	99.05	48.49	63.20	217.49	1854.81
K2B	1 Dec 2010	17.490783	47.0903	53471.01	30.98	195.04	99013.76	12.26	74.42	19.83	34234.16	29.04	12312.73	51.21	13726.21	420.77	10.92	7113.38	26.79	2.65	3380.35	108.92	64.02	66.35	191.67	967.99
K2C	1 Dec 2010	17.490783	47.0903	53402.44	38.69	145.44	105674.42	14.99	97.04	21.15	43767.32	30.13	10679.66	51.90	13940.82	512.65	8.12	7215.52	35.23	11.33	3967.30	136.46	63.08	86.95	235.46	1538.32
K3A	1 Dec 2010	17.490783	47.117733	66950.62	90.97	116.37	57764.16	90.97	647.06	62.79	180813.29	71.28	1846.30	67.68	3946.81	2463.56	2.75	36345.12	257.30	145.29	21943.64	774.40	150.10	577.64	286.46	2855.91
K3B	1 Dec 2010	17.490783	47.117733	50311.65	34.96	172.33	85361.12	37.72	271.94	33.77	90308.34	44.28	6464.93	54.53	7877.77	1351.97	9.59	13018.64	95.34	52.11	8873.86	343.11	85.03	229.36	210.64	12347.51
K3C	1 Dec 2010	17.490783	47.117733	51693.00	29.90	216.53	94288.18	28.42	198.91	31.22	69316.89	43.03	8317.30	59.41	9507.87	1004.73	9.46	8808.06	69.54	29.43	6428.95	259.24	77.85	162.19	207.75	13201.97
M10A	1 Dec 2010	17.463783	47.563783	41179.56	20.36	224.69	98599.49	9.64	41.24	24.37	17116.99	38.77	8899.98	24.00	8095.39	1443.41	11.29	4250.16	20.13	13.44	1638.51	95.68	81.69	25.88	231.61	7880.75
M10B	1 Dec 2010	17.463783	47.563783	42156.75	24.43	213.42	98725.32	9.17	36.25	24.06	16930.78	38.64	8564.16	24.01	8067.47	1474.41	12.09	4109.62	18.98	1.23	1538.38	103.46	80.16	22.94	239.68	3417.21
M10C	1 Dec 2010	17.463783	47.563783	28578.87	<0.01	172.11	46543.86	8.43	34.55	17.28	15894.01	23.62	9894.11	20.95	5945.90	1063.30	7.47	4842.71	18.42	<0.01	1494.17	59.29	70.39	18.00	140.95	3598.53
M11A	1 Dec 2010	17.517267	47.6107	52565.42	22.06	89.96	145542.88	4.66	24.21	18.35	10470.88	66.44	5329.82	15.75	8138.86	845.58	17.03	2333.28	12.40	<0.01	883.85	168.02	42.12	8.76	244.95	4371.44
M11B	1 Dec 2010	17.517267	47.6107	48303.56	54.27	62.34	150363.92	2.53	17.32	15.12	6660.07	82.96	3514.39	7.85	7095.45	448.02	20.74	2104.70	7.56	<0.01	590.88	206.44	32.89	6.81	231.34	4807.81
M11C	1 Dec 2010	17.517267	47.6107	50565.58	40.77	140.97	153253.59	1.95	18.96	15.52	5566.63	77.34	2860.30	8.87	7154.85	392.50	15.45	1603.26	7.87	<0.01	544.71	217.78	25.90	4.57	232.82	4448.02
M1A	1 Dec 2010	17.204333	47.117733	20991.19	4.02	163.32	15669.04	5.74	33.13	9.15	10876.91	8.06	7271.74	11.39	3791.64	284.11	8.09	4940.52	11.40	<0.01	1685.31	26.62	24.77	17.99	90.14	174.45
M1B	1 Dec 2010	17.204333	47.117733	22649.27	<0.01	184.95	18222.19	5.77	27.23	10.00	10610.40	9.34	8183.91	12.70	3752.13	289.98	7.29	5216.74	12.99	2.34	1548.26	26.31	26.57	15.01	81.99	155.06
M1C	1 Dec 2010	17.204333	47.117733	24846.68	7.61	202.71	17357.83	6.62	30.60	8.82	11937.71	9.33	9040.87	13.90	4031.97	304.37	7.72	5891.47	13.06	<0.01	1843.09	33.61	27.47	22.19	102.29	136.74
M2A	1 Dec 2010	17.198783	47.170083	46951.04	15.62	202.37	57924.84	47.74	84.39	28.15	60074.27	13.56	11193.44	32.31	8597.05	21355.10	10.54	7945.23	39.93	13.63	3712.35	138.88	65.57	80.23	267.72	797.38
M2B	1 Dec 2010	17.198783	47.170083	63636.84	130.16	179.31	90731.80	68.16	448.16	44.59	139969.78	55.08	3645.93	59.51	8397.62	3494.04	7.44	30933.85	193.34	111.32	16651.51	573.54	115.13	423.39	365.07	2386.37
M2C	1 Dec 2010	17.198783	47.170083	37324.15	7.93	194.85	55152.30	30.68	83.92	19.80	42851.15	15.80	8469.59	27.71	6657.16	10595.82	10.75	8255.41	39.02	22.63	3694.05	128.48	57.17	79.95	244.06	929.97
M4A	1 Dec 2010	17.21265	47.2891	35736.61	11.42	268.51	48357.33	15.88	40.66	14.39	21528.46	14.50	11386.00	24.28	8489.37	4736.99	8.84	7308.46	17.41	3.32	2172.03	50.40	43.75	26.40	203.29	808.85
M4B	1 Dec 2010	17.21265	47.2891	35018.64	43.28	258.96	48698.74	16.35	42.21	16.17	21866.24	15.58	11664.46	25.96	8644.78	4727.54	6.24	7365.43	19.91	<0.01	2056.21	58.66	51.02	28.87	224.28	991.49
M4C	1 Dec 2010	17.21265	47.2891	14983.34	7.44	259.48	15276.85	17.36	41.88	14.23	22322.05	14.57	11547.28	26.02	7799.00	4946.54	4.70	6875.11	19.59	8.38	2306.16	55.95	46.84	32.08	122.53	784.99
M5A	1 Dec 2010	17.274767	47.318317	21192.80	5.97	235.43	71844.75	25.40	26.85	14.32	23006.21	6.05	6166.53	15.94	4527.52	10184.61	8.34	2160.87	12.91	<0.01	1219.29	50.41	34.70	23.64	302.34	1275.35
M5B	1 Dec 2010	17.274767	47.318317	30658.57	31.47	335.71	105028.28	35.72	39.15	18.53	32847.98	5.61	8911.78	23.58	6878.23	14438.15	7.40	3073.86	21.16	0.06	1818.64	73.65	48.84	35.07	446.44	1571.56
M5C	1 Dec 2010	17.274767	47.318317	30826.00	18.98	335.13	96408.77	36.07	40.38	20.33	32928.78	7.34	8735.07	21.93	6915.61	13721.36	7.93	3569.16	22.07	25.71	1978.00	76.83	60.41	38.77	415.75	1851.56
M6A	1 Dec 2010	17.32395	47.352117	24495.25	0.03	208.23	32679.00	5.65	26.82	11.57	10277.26	14.33	8042.75	13.94	5195.65	666.65	8.97	5628.52	12.02	128.07	1453.33	30.07	40.81	12.60	111.84	862.10
M6B	1 Dec 2010	17.32395	47.352117	22533.81	9.93	199.74	29041.91	4.73	22.17	9.29	9465.78	13.71	7918.75	13.96	4895.73	544.56	6.92	5025.32	10.04	55.16	1126.85	28.20	31.69	13.53	100.83	734.58
M6C	1 Dec 2010	17.32395	47.352117	25795.44	26.62	205.71	35823.57	5.29	26.44	9.43	10161.42	14.62	8665.56	13.50	5062.38	608.27	6.90	5961.69	11.98	60.95	1345.14	33.03	28.33	12.28	120.61	676.32
M7A	1 Dec 2010	17.3484	47.41015	47646.46	110.41	195.31	113577.04	6.92	28.96	20.92	11932.80	38.42	6330.75	20.06	13485.67	1950.82	13.55	3320.52	11.80	0.52	1163.45	116.88	53.03	16.21	282.72	3270.42
M7B	1 Dec 2010	17.3484	47.41015	58355.20	197.29	179.21	141454.74	6.20	28.02	22.01	11262.23	38.75	5771.73	22.29	22470.48	1927.52	7.21	2851.15	11.63	7.89	964.04	136.13	51.01	14.13	357.91	4360.75
M7C	1 Dec 2010	17.3484	47.41015	58723.98	209.92	193.20	150146.30	5.12	26.19	20.71	10236.59	41.57	5170.92	20.23	21326.43	1687.81	11.03	2734.65	13.52	<0.01	900.50	148.19	47.95	11.05	367.22	4030.23
M8A	1 Dec 2010	17.3837	47.449333	60297.78	33.35	288.90	88285.64	10.76	47.94	26.44	21451.69	39.91	11735.57	31.06	10935.89	1087.21	7.73	3557.56	22.58	<0.01	2009.55	113.28	92.17	33.70	224.66	2710.37
M8B	1 Dec 2010	17.3837	47.449333	46643.85	8.37	279.26	42620.20	12.56	55.20	21.36	23031.52	23.75	12604.77	31.71	8699.93	833.39	4.40	4184.83	26.30	33.58	2169.36	71.98	98.94	32.74	121.50	1332.67
M8C	1 Dec 2010	17.3837	47.449333	51181.18	12.69	233.32	91719.19	9.49	42.23	18.22	16063.96	33.48	9532.17	19.55	8372.56	817.44	6.84	6615.75	18.69	18.89	1968.49	89.61	204.14	29.29	236.45	2179.31
M9A	1 Dec 2010	17.412567	47.51785	22441.72	16.45	158.55	23548.73	2.94	19.28	7.58	8854.63	8.86	7155.41	10.76	2981.01	370.01	8.47	6416.85	7.83	3.02	1237.01	23.28	22.69	8.64	73.12	1390.29
M9B	1 Dec 2010	17.412567	47.51785	23666.83	<0.01	162.19	24927.89	5.58	24.55	9.79	11257.70	11.13	7299.03	11.25	4276.86	498.50	4.42	6067.92	11.30	8.85	1589.33	30.58	34.68	19.36	106.62	2108.25
M9C	1 Dec 2010	17.412567	47.51785	23573.88	8.24	217.02	33121.70	3.72	16.93	5.33	8498.47	9.48	7718.82	8.86	2996.22	377.51	9.08	6719.02	6.75	<0.01	1284.68	25.26	21.80	7.61	85.17	5193.77
MD1A	1 Dec 2010	17.490783	47.691567	65439.16	22.45	477.82	12384.98	20.67	78.43	27.51	35633.46	25.41	18577.47	42.55	8753.10	1072.42	5.85	8072.87	32.53	8.80	4594.86	98.60	100.61	37.49	100.04	583.81
MD1B	1 Dec 2010	17.490783	47.691567	75541.17	5.49	498.68	12950.96	24.26	92.75	34.65	42648.21	31.93	20955.42	51.00	9956.73	1410.82	6.55	7841.79	39.20	12.22	4790.38	117.43	122.49	45.04	109.33	717.19
MD1C	1 Dec 2010	17.490783	47.691567	72615.76	14.28	282.39	11925.53	23.14	91.61	32.51	41285.58	31.03	20311.14	48.60	9582.35	926.68	4.54	8476.96	38.12	11.39	4884.86	114.15	112.72	44.10	107.65	402.10
R1A	1 Dec 2010	17.430133	47.581733	66027.61	12.06	436.70	10535.00	20.42	79.72	25.45	34284.46	27.67	18572.18	40.70	8304.86	944.78	4.99	9683.18	32.10	0.80	4630.63	96.50	93.71	35.68	99.68	476.11
R1B	1 Dec 2010	17.430133	47.581733	64128.46	<0.01	450.51	10076.84	19.75	73.18	22.71	32719.17	25.76	17828.99	38.13	7861.42	993.98	6.24	10227.21	31.66	<0.01	4688.07	93.28	87.25	35.55	100.17	426.11
R1C	1 Dec 2010	17.430133	47.581733	69401.94	<0.01	456.88	10570.14	21.79	86.43	28.08	37502.11	28.37	19585.31	43.81	8887.21	990.79	3.89	9368.75	36.60	<0.01	4834.99	106.20	100.34	39.89	101.98	471.53
R2A	1 Dec 2010	17.625333	47.68425	75984.89	<0.01	499.55	11433.58	24.84	95.55	37.20	43894.67	33.82	21572.18	52.11	10459.51	1258.34	4.27	7146.07	46.03	13.59	4886.50	117.72	131.81	38.08	100.63	631.91
R2B	1 Dec 2010	17.625333	47.68425	75303.39	<0.01	439.85	10884.69	23.03	93.61	35.26	42124.77	31.76	20876.17	51.60	10078.29	1300.10	7.43	6783.03	44.15	6.80	4574.35	117.32	126.01	38.39	97.89	642.97
R2C	1 Dec 2010	17.625333	47.68425	57178.92	<0.01	411.01	15310.38	17.42	63.41	19.19	28982.28	22.92	16135.68	33.66	7753.68	915.89	5.67	9600.80	24.66	<0.01	4333.74	81.61	79.32	34.03	102.09	510.50
T1A	1 Dec 2010	17.49079	47.117733	53720.61	47.21	144.51	58672.47	67.86	462.74	43.59	147068.57	53.39	5228.95	64.57	7372.87	3146.72	7.42	27945.78	174.05	98.45	16047.29	599.76	120.76	401.34	284.73	2104.79
T1B	1 Dec 2010	17.49079	47.117733	59095.74	54.77	151.27	66006.26	65.09	433.62	46.15	139166.39	52.97	5744.16	64.49	8086.80	3053.73	10.22	26218.02	160.75	85.32	15050.37	574.93	116.72	387.25	281.28	1742.55
T1C	1 Dec 2010	17.49079	47.117733	58241.25	83.25	90.08	64932.87	69.94	428.01	49.64	138455.76	53.91	5379.68	62.46	7698.39	3076.50	9.67	25479.84	166.43	96.70	14122.95	561.45	116.51	360.76	265.43	2938.55
T2A	1 Dec 2010	17.568217	47.1051	30103.03	<0.01	171.85	46965.42	9.27	31.10	3.84	13641.58	13.12	8744.78	13.82	12815.39	451.71	7.36	9996.33	6.66	<0.01	4371.13	35.40	27.36	46.32	135.67	173.54
T2B	1 Dec 2010	17.568217	47.1051	28421.55	5.25	169.92	39249.41	7.72	25.38	4.32	12394.02	13.82	9339.98	13.31	9738.06	403.94	10.48	9265.35	6.81	1.40	3403.73	32.37	24.35	32.24	120.20	108.48
T2C	1 Dec 2010	17.568217	47.1051	23350.18	<0.01	149.80	35013.29	8.17	31.08	37.24	13129.45	12.08	9621.13	13.58	9048.42	406.76	9.93	9304.75	9.48	6.46	3221.54	35.37	28.02	26.68	117.17	135.18
T3A	1 Dec 2010	17.439667	47.10985	25342.31	5.00	187.52	57815.81	33.23	131.15	17.26	49758.81	17.05	5850.19	24.52	5839.77	7669.17	13.18	10490.49	51.86	26.82	6094.32	179.31	47.08	125.24	255.40	2586.94
T3B	1 Dec 2010	17.439667	47.10985	24864.08	4.86	196.50	58786.77	37.94	72.42	16.32	39308.16	7.22	7516.46	24.94	5649.88	14760.65	13.96	7788.75	34.69	18.62	3867.03	117.06	43.48	75.85	263.33	1964.28
T3C	1 Dec 2010	17.439667	47.10985	30344.50	27.01	177.46	66237.46	39.65	145.14	18.63	55300.64	13.66	6208.71	30.10	5292.95	11886.84	11.76	11268.93	56.28	25.34	6409.22	192.61	49.91	134.40	351.74	9001.73
T4A	1 Dec 2010	17.3851	47.116667	24508.27	35.70	179.97	47951.17	15.76	55.48	9.17	26161.92	14.55	6852.28	19.39	5194.38	3894.06	11.62	8017.87	18.29	22.16	3156.43	77.79	33.52	43.72	167.33	1018.29
T4B	1 Dec 2010	17.3851	47.116667	21075.66	12.33	170.58	51375.26	13.05	44.19	7.30	18866.69	11.47	6682.53	17.80	4133.99	4380.16	11.79	6825.89	12.40	11.44	1963.92	56.08	26.75	24.82	164.75	1293.77
T4C	1 Dec 2010	17.3851	47.116667	27356.37	<0.01	161.02	49930.85	25.33	85.02	9.11	47494.07	17.87	5884.70	19.58	6699.28	3839.14	7.68	6541.14	11.52	21.51	9173.78	101.62	43.66	95.22	175.73	832.09
T5A	1 Dec 2010	17.295683	47.11575	45294.66	7.83	265.67	68133.72	21.50	91.74	21.34	35743.79	34.68	10253.59	43.40	8799.08	3564.99	12.16	8493.73	38.50	91.37	4525.30	136.06	77.48	89.93	223.02	1359.29
T5B	1 Dec 2010	17.295683	47.11575	45494.88	35.24	295.31	65321.67	15.39	47.52	19.94	22027.03	33.34	12165.53	36.41	9081.22	3173.58	11.24	7543.49	21.57	81.62	2915.29	82.05	75.31	48.47	209.69	1177.12
T5C	1 Dec 2010	17.295683	47.11575	52506.76	13.12	239.34	63879.70	18.06	72.56	24.48	30028.56	37.14	13168.74	45.95	10183.12	2724.88	11.40	8045.31	32.10	113.52	3724.86	112.68	88.03	64.80	207.92	1308.06
T6A	1 Dec 2010	17.2081	47.120583	47564.41	59.30	180.25	96434.17	25.40	119.21	28.64	44925.08	34.13	7870.96	35.60	10677.25	3317.76	9.34	11533.50	51.69	57.16	5054.13	190.51	66.93	106.56	281.76	2306.38
T6B	1 Dec 2010	17.2081	47.120583	53296.54	71.86	157.14	99688.94	44.08	274.86	35.30	91939.92	44.90	5925.90	44.46	9582.26	2742.97	7.96	20783.35	117.48	79.74	10741.64	375.84	88.71	252.04	302.37	2320.43
T6C	1 Dec 2010	17.2081	47.120583	56589.72	87.47	202.13	96166.21	51.37	341.18	37.55	106461.09	47.14	5886.58	50.78	8849.32	2878.22	8.28	24505.29	143.96	82.52	13326.73	436.69	98.88	323.30	322.71	2326.18
K2A13	10 Sep 2013	17.490783	47.0903	48069.12	<0.01	286.57	57697.97	<0.01	76.37	3.66	27691.41	<0.01	13771.93	36.12	9221.33	616.59	17.70	9011.88	11.16	<0.01	3194.72	72.06	5382.89	61.37	163.14	782.09
K2B13	10 Sep 2013	17.490783	47.0903	41939.57	15.28	269.86	59987.63	<0.01	56.72	7.28	25390.73	2.86	12862.13	28.05	8475.77	823.49	14.15	8052.45	14.50	<0.01	2813.60	76.46	33.54	43.07	149.62	840.50
K2C13	10 Sep 2013	17.490783	47.0903	43819.55	9.48	265.63	55912.99	<0.01	60.19	5.85	23942.46	2.22	12956.40	27.57	8705.72	744.77	14.15	8307.22	15.89	<0.01	2741.07	69.77	23.09	42.27	144.12	840.57
K3A13	10 Sep 2013	17.490783	47.117733	45368.46	41.98	182.35	60906.02	<0.01	57.43	9.79	20183.87	98.27	10694.17	101.32	9955.15	333.72	59.73	5017.76	20.32	<0.01	1802.40	302.23	25.32	37.96	163.42	1973.65
K3B13	10 Sep 2013	17.490783	47.117733	47066.77	59.79	204.75	61022.98	<0.01	66.11	16.76	26839.29	153.29	14423.34	136.32	12249.86	441.97	84.43	7109.89	29.54	6.10	2453.26	411.62	40.67	44.95	205.69	2789.63
K3C13	10 Sep 2013	17.490783	47.117733	68811.10	71.58	239.14	84877.01	<0.01	80.54	14.88	29421.74	170.51	15070.05	125.74	13563.51	585.29	109.76	8481.11	32.54	<0.01	2544.60	360.87	38.58	53.38	220.58	4265.49
M1A13	10 Sep 2013	17.204333	47.117733	59486.02	57.29	185.19	57421.24	60.91	480.66	38.87	124814.26	57.28	6113.35	54.16	6679.02	2498.21	5.83	25693.16	212.86	102.57	#VALUE!	578.01	87.54	447.75	375.91	2421.52
M1B13	10 Sep 2013	17.204333	47.117733	64971.33	86.19	135.48	55122.39	80.19	606.40	46.85	148136.68	80.47	4158.29	63.16	5396.02	2807.09	5.88	31721.54	267.79	132.74	#VALUE!	743.49	96.81	566.39	398.12	2221.92
M1C13	10 Sep 2013	17.204333	47.117733	64418.65	53.91	187.60	60818.31	57.90	508.94	36.83	138121.10	51.96	6157.56	57.19	6492.92	2539.98	7.59	26193.03	231.89	98.47	17804.67	594.97	82.04	487.45	382.09	2406.22
M2A13	10 Sep 2013	17.198783	47.170083	34234.92	33.72	182.98	61563.40	3.24	65.04	15.73	23882.65	23.92	7680.15	28.60	7294.83	2186.64	8.57	4779.97	30.35	63.42	2434.38	104.19	79.24	56.66	224.87	1747.84
M2B13	10 Sep 2013	17.198783	47.170083	52662.04	64.66	191.88	82432.56	26.40	248.17	26.90	76974.39	44.23	6695.36	44.84	8516.81	2532.96	8.83	14164.72	111.23	86.24	9384.35	320.28	89.47	230.93	344.75	3202.26
M2C13	10 Sep 2013	17.198783	47.170083	49142.95	31.74	241.17	76467.42	<0.01	81.42	22.07	27557.69	30.97	9059.46	41.34	10424.93	2365.79	18.43	5235.93	36.24	64.22	2757.21	116.53	115.82	57.64	262.69	3497.73
T1A13	10 Sep 2013	17.49079	47.117733	38730.44	<0.01	207.72	88549.89	<0.01	47.88	9.13	17384.75	7.91	9394.69	24.43	9936.54	1712.47	11.07	6310.79	10.44	35.21	2496.24	58.27	28.84	43.77	206.35	1967.97
T1B13	10 Sep 2013	17.49079	47.117733	30737.13	10.66	160.13	116877.36	<0.01	38.56	10.21	14757.98	15.17	7272.25	21.82	8577.43	2014.32	10.03	4780.35	13.17	38.31	1933.64	58.21	38.56	30.07	239.14	2838.81
T1C13	10 Sep 2013	17.49079	47.117733	31775.59	<0.01	160.20	94295.28	<0.01	42.69	7.67	17642.24	7.68	6391.81	21.14	7924.37	1831.74	12.28	4626.12	11.03	29.18	1875.80	54.49	27.20	33.17	200.57	2013.63
T2A13	10 Sep 2013	17.568217	47.1051	35958.08	<0.01	216.88	44958.63	<0.01	41.05	2.85	13858.58	1.54	9751.95	16.37	12058.54	418.73	6.99	9484.96	3.54	15.74	2874.60	36.59	21.30	35.30	148.04	490.12
T2B13	10 Sep 2013	17.568217	47.1051	36785.85	<0.01	220.41	45206.93	<0.01	53.29	2.44	14929.76	<0.01	9704.76	15.58	12797.24	463.30	8.10	9214.54	3.28	8.37	3075.48	37.64	13.00	34.32	154.13	552.35
T2C13	10 Sep 2013	17.568217	47.1051	35855.36	<0.01	193.36	50445.59	<0.01	60.37	0.42	19481.98	7.46	8900.25	15.11	14893.95	713.84	7.77	9081.33	6.96	8.78	5842.35	46.25	15.45	65.80	171.91	489.35
T3A13	10 Sep 2013	17.439667	47.10985	31825.00	<0.01	190.86	47132.95	<0.01	50.51	3.54	20291.53	5.08	8843.09	17.37	7516.23	3022.63	10.00	6502.02	7.92	31.86	2606.70	57.70	17.03	40.90	174.88	630.29
T3B13	10 Sep 2013	17.439667	47.10985	24852.66	21.53	153.97	75795.01	2.42	38.22	7.80	15940.92	14.86	6334.19	20.74	7609.38	2669.06	7.05	5379.49	8.43	38.77	2192.14	68.56	24.40	30.18	235.08	1506.33
T3C13	10 Sep 2013	17.439667	47.10985	34460.97	12.00	188.19	77847.84	<0.01	58.62	10.54	33496.26	14.73	7304.27	22.30	9562.53	2773.63	19.88	6389.04	21.69	32.27	2945.79	125.69	25.16	54.37	274.24	1746.39
T4A13	10 Sep 2013	17.3851	47.116667	45872.10	32.52	234.80	83891.25	<0.01	54.78	15.32	21954.94	38.71	8863.15	41.22	9971.14	3191.25	18.51	5150.84	19.14	75.14	2364.44	114.00	47.93	50.09	269.51	1522.10
T4B13	10 Sep 2013	17.3851	47.116667	17105.89	16.48	63.47	59551.78	<0.01	29.34	0.88	29430.68	5.29	2796.97	10.24	3835.80	2301.64	4.85	1967.88	<0.01	8.16	1088.26	39.68	12.44	15.87	162.08	722.13
T4C13	10 Sep 2013	17.3851	47.116667	32588.52	22.76	155.87	56278.09	<0.01	39.91	7.63	15558.65	19.02	5746.64	27.37	6823.00	1959.51	10.19	3907.26	8.16	36.99	1726.23	73.56	20.79	33.41	177.44	983.06
T5A13	10 Sep 2013	17.295683	47.11575	50221.96	35.99	247.55	97282.35	<0.01	94.40	19.48	21654.32	37.01	9238.58	39.23	11377.33	2409.57	15.04	5420.45	38.21	110.33	2499.50	114.48	64.50	50.64	289.92	2302.09
T5B13	10 Sep 2013	17.295683	47.11575	42618.77	25.49	219.61	75747.83	<0.01	51.30	16.29	19732.76	20.11	8250.08	30.66	9541.60	3631.87	15.11	5793.67	18.60	140.51	2095.20	86.40	56.45	37.63	243.91	1540.95
T5C13	10 Sep 2013	17.295683	47.11575	43970.45	36.93	231.73	76194.86	<0.01	56.49	15.65	21970.69	32.91	8953.10	36.99	9365.85	3737.17	16.79	5025.13	23.14	103.11	2174.36	104.46	54.18	40.31	242.58	2164.86
T6A13	10 Sep 2013	17.2081	47.120583	38520.63	42.80	233.38	68895.72	2.44	58.84	23.13	24125.09	42.84	10265.58	36.34	10516.29	3230.64	13.97	5510.03	31.30	114.51	2545.89	122.41	64.21	48.72	281.82	2769.79
T6B13	10 Sep 2013	17.2081	47.120583	50892.02	29.35	258.60	82819.52	0.10	74.11	22.39	24102.28	35.34	9988.01	41.44	11232.75	3091.39	16.09	5513.63	31.47	125.36	2490.75	119.91	65.08	48.95	293.94	2789.04
T6C13	10 Sep 2013	17.2081	47.120583	31186.22	45.86	224.94	68044.90	6.23	68.21	23.00	26857.65	45.69	10168.74	43.60	10266.71	3335.79	8.87	5017.76	31.92	114.66	2838.28	128.47	70.10	53.94	302.18	2410.66
M10A13	10 Sep 2013	17.463783	47.563783	24037.04	<0.01	153.76	35513.04	<0.01	22.79	5.23	9820.07	<0.01	7236.03	8.73	3807.49	445.01	8.20	6671.08	<0.01	7.96	1601.79	19.59	41.58	12.44	117.90	920.86
M10B13	10 Sep 2013	17.463783	47.563783	22861.90	<0.01	150.30	28306.28	<0.01	22.15	6.22	9518.96	<0.01	7321.07	9.64	3421.60	428.21	<0.01	5543.77	<0.01	8.94	1440.18	18.77	39.19	13.04	104.10	1271.08
M10C13	10 Sep 2013	17.463783	47.563783	22589.58	<0.01	142.79	25652.50	<0.01	22.85	6.11	8750.71	<0.01	7167.87	8.18	3324.81	451.70	<0.01	6221.19	<0.01	<0.01	1274.00	15.32	36.68	14.18	103.07	976.51
M11A13	10 Sep 2013	17.517267	47.6107	34252.39	<0.01	242.23	77115.00	<0.01	42.04	22.22	16990.49	0.43	8865.41	21.13	9310.12	1199.25	8.76	4997.65	15.32	7.44	1503.63	49.29	81.30	21.96	225.31	2544.19
M11B13	10 Sep 2013	17.517267	47.6107	35101.75	0.45	253.43	84365.32	<0.01	44.60	25.04	18172.63	0.02	9088.54	21.62	9953.48	1302.37	11.87	4650.67	17.34	5.90	1825.56	54.79	65.81	28.09	230.02	3752.30
M11C13	10 Sep 2013	17.517267	47.6107	32583.73	<0.01	232.04	77144.44	<0.01	38.47	15.60	15848.38	<0.01	8440.04	17.44	9044.28	1035.86	13.74	5241.47	14.83	<0.01	1376.22	45.60	48.10	20.82	218.58	3299.18
M4A13	10 Sep 2013	17.21265	47.2891	42400.69	22.18	248.07	59116.52	<0.01	69.25	17.22	21253.02	23.84	9183.52	34.40	8733.26	2031.93	9.97	6232.68	28.58	33.86	2544.91	86.41	83.46	37.82	219.55	2134.50
M4B13	10 Sep 2013	17.21265	47.2891	52901.22	29.95	318.35	80931.43	2.15	83.93	25.37	28508.19	37.91	10494.71	48.05	10833.14	3201.92	11.57	4976.39	48.40	88.61	2723.44	127.86	126.71	53.10	290.92	3019.62
M4C13	10 Sep 2013	17.21265	47.2891	38464.57	6.17	225.70	53180.05	<0.01	49.76	12.82	17749.42	14.47	8982.72	28.59	8197.16	1626.11	10.05	6802.74	20.26	18.63	1993.22	62.95	62.64	28.67	206.46	1772.51
M5A13	10 Sep 2013	17.274767	47.318317	36848.06	0.10	257.85	91276.07	<0.01	54.65	32.97	19421.12	24.71	8143.80	27.05	8678.28	2058.42	23.54	4325.41	58.64	30.99	1875.21	90.94	75.27	36.60	318.78	4411.99
M5B13	10 Sep 2013	17.274767	47.318317	41974.27	30.41	246.74	85517.07	<0.01	53.85	19.86	20358.64	33.90	8063.51	32.17	8917.67	2270.12	12.81	5189.19	30.21	44.57	2051.87	99.22	88.59	38.15	325.40	3667.96
M5C13	10 Sep 2013	17.274767	47.318317	39529.83	27.28	244.18	74040.86	<0.01	53.73	19.19	19935.46	25.66	8419.03	30.35	10157.94	2036.32	13.33	4945.72	25.40	38.69	2013.98	90.03	77.93	37.78	278.70	3678.20
M6A13	10 Sep 2013	17.32395	47.352117	19054.13	<0.01	133.23	50307.72	<0.01	20.65	3.87	7112.22	<0.01	7159.29	9.32	4500.46	512.71	8.22	4451.73	<0.01	<0.01	928.50	14.81	12.16	11.57	151.54	924.38
M6B13	10 Sep 2013	17.32395	47.352117	35454.14	0.41	265.70	76402.42	<0.01	46.30	11.88	16378.44	3.88	9227.78	21.88	9455.98	1453.99	<0.01	6695.23	19.22	12.29	1666.05	53.81	47.76	22.19	263.88	2183.94
M6C13	10 Sep 2013	17.32395	47.352117	28519.04	5.38	217.56	57297.93	<0.01	30.24	5.77	10315.96	<0.01	10229.27	16.87	7149.05	985.83	8.43	6336.15	5.12	5.76	1356.78	29.94	110.15	16.78	215.53	1186.96
M7A13	10 Sep 2013	17.3484	47.41015	25231.65	<0.01	185.87	45889.76	<0.01	36.76	8.60	12106.26	0.10	7196.10	15.57	7089.65	936.80	<0.01	5274.87	6.52	10.55	1831.47	31.48	63.54	23.74	174.46	1109.21
M7B13	10 Sep 2013	17.3484	47.41015	29230.77	<0.01	205.39	54034.47	<0.01	32.04	12.00	12156.71	3.40	7443.96	16.43	8707.77	1025.66	<0.01	6099.82	5.39	16.61	1958.14	34.77	46.56	17.08	190.97	1200.34
M7C13	10 Sep 2013	17.3484	47.41015	29832.71	0.58	222.87	52477.29	<0.01	33.69	13.61	13238.13	0.55	7806.56	19.21	7007.21	1062.88	9.86	4770.71	9.19	16.40	1534.46	40.51	67.16	19.44	194.61	1238.82
M8A13	10 Sep 2013	17.3837	47.449333	27657.36	<0.01	179.71	48627.32	<0.01	28.46	7.92	10768.88	<0.01	7604.34	12.18	6773.72	599.13	7.74	7044.35	3.04	17.08	2000.71	22.64	30.32	16.21	177.43	749.12
M8B13	10 Sep 2013	17.3837	47.449333	30083.96	2.51	237.14	41245.64	<0.01	35.75	13.41	12270.32	<0.01	9843.97	17.13	6785.59	670.37	<0.01	7659.42	8.87	15.46	1628.40	29.79	37.25	19.33	178.47	680.58
M8C13	10 Sep 2013	17.3837	47.449333	34750.97	<0.01	223.63	56524.81	<0.01	42.81	12.66	14913.01	<0.01	9466.12	19.82	9392.68	947.20	9.02	7685.93	14.50	35.47	1917.46	35.86	42.65	22.49	210.81	848.76
M9A13	10 Sep 2013	17.412567	47.51785	33646.65	<0.01	242.36	77907.04	<0.01	48.70	18.72	16505.85	0.97	7863.40	20.10	8460.60	1018.87	12.27	4966.29	15.76	7.78	1890.50	53.36	78.12	26.78	227.70	3500.96
M9B13	10 Sep 2013	17.412567	47.51785	29019.34	6.21	195.19	57921.15	<0.01	30.70	15.39	13204.27	<0.01	7509.42	14.43	5934.29	928.32	9.32	6153.20	4.88	8.67	1432.46	31.12	73.23	20.10	176.29	1800.61
M9C13	10 Sep 2013	17.412567	47.51785	25405.41	<0.01	169.75	34568.65	<0.01	24.07	6.74	8388.36	<0.01	7838.92	10.68	4493.22	417.73	<0.01	7450.95	<0.01	<0.01	1044.77	13.89	20.43	11.90	129.39	815.04
MD1A13	10 Sep 2013	17.490783	47.691567	29572.95	<0.01	123.58	11829.64	<0.01	25.71	0.40	25530.70	4.25	5874.27	8.53	3798.50	1308.53	5.23	7530.78	<0.01	11.71	5240.63	30.78	12.82	11.70	87.76	172.38
MD1B13	10 Sep 2013	17.490783	47.691567	24567.48	<0.01	146.49	6993.15	<0.01	19.45	0.40	11691.96	<0.01	7492.13	7.41	2620.19	535.63	5.82	6696.60	<0.01	18.47	1871.35	17.61	1.94	9.76	71.13	127.09
MD1C13	10 Sep 2013	17.490783	47.691567	27445.66	<0.01	164.21	10744.74	<0.01	28.16	0.40	20236.08	<0.01	6904.45	7.42	3244.56	1070.26	6.43	6363.67	<0.01	10.31	4546.61	22.00	6.39	41.38	85.14	210.21
R1A13	10 Sep 2013	17.430133	47.581733	62525.62	<0.01	409.47	19546.22	<0.01	70.34	18.37	30990.56	5.11	15341.01	32.28	8313.05	1162.19	9.38	8381.15	24.49	6.98	3400.63	83.53	56.09	30.25	127.59	700.65
R1B13	10 Sep 2013	17.430133	47.581733	70664.81	11.09	463.74	17399.80	2.20	86.22	24.07	36266.15	11.30	17068.36	40.38	9343.90	1444.49	5.36	8578.56	34.18	8.48	3800.54	96.41	72.21	37.89	127.96	615.82
R1C13	10 Sep 2013	17.430133	47.581733	57928.24	<0.01	380.08	20894.40	<0.01	89.19	18.38	28731.03	8.21	14294.00	30.96	7838.27	1295.27	5.98	8358.18	34.69	11.82	3525.61	72.86	54.30	29.77	119.29	733.88
R2A13	10 Sep 2013	17.625333	47.68425	50450.34	<0.01	292.63	17378.85	1.08	51.61	8.69	36428.66	9.79	10961.12	23.97	7542.42	1629.00	7.19	8707.43	11.22	<0.01	7398.02	64.97	38.52	27.28	115.52	489.14
R2B13	10 Sep 2013	17.625333	47.68425	50753.46	<0.01	302.50	16200.47	<0.01	64.13	9.95	35277.52	4.77	11318.34	23.85	7838.85	1482.96	8.42	7555.26	16.32	19.52	5758.62	64.91	43.62	24.79	114.43	565.83
R2C13	10 Sep 2013	17.625333	47.68425	30314.40	<0.01	161.99	14031.64	<0.01	54.86	0.40	25396.64	4.90	6687.88	8.92	5144.21	1477.83	5.75	6623.98	<0.01	6.49	5267.56	33.30	15.99	12.60	84.57	252.36
